# Supplementary material for: Human brain lesion-deficit inference remapped
Source: PubMed Central journal article supplement (PMC4132645; doi:10.1093/brain/awu164), 2014-06-28

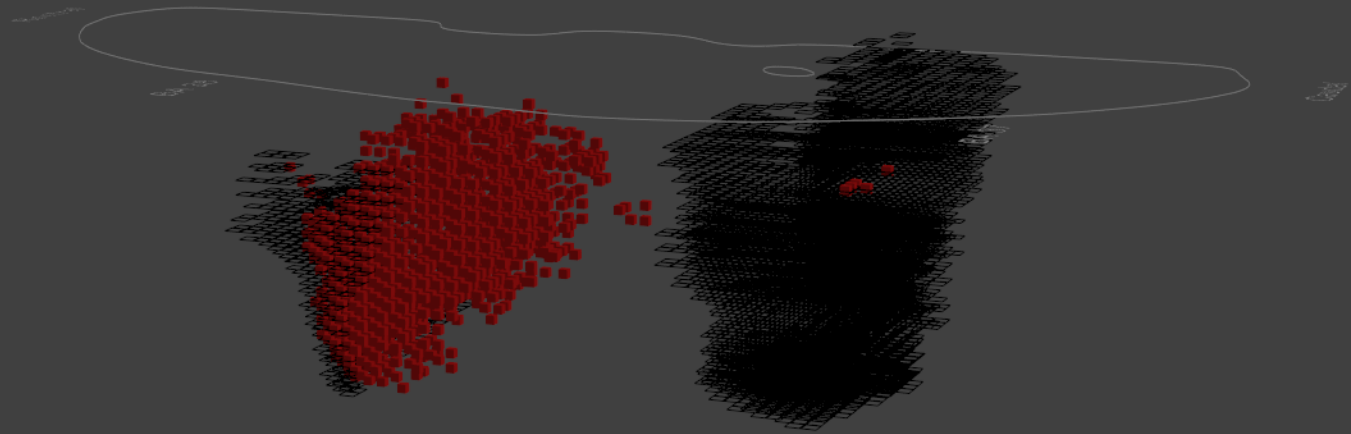

Supplement: supp_awu164_brain-2014-00069-File009.pdf [file supp_awu164_brain-2014-00069-File009.pdf]
